# Supplementary material for: Chronic prenatal delta-9-tetrahydrocannabinol exposure adversely impacts placental function and development in a rhesus macaque model
Source: Sci Rep. 2022 Nov 24;12:20260. doi: 10.1038/s41598-022-24401-4 (PMC9691736; doi:10.1038/s41598-022-24401-4)
Supplement: Supplementary file 1 — Supplementary Table 1. [file 41598_2022_24401_MOESM1_ESM.xlsx]

## Sheet: THCvsCON_DEG
Differential expression analysis for placenta RNA-seq dataset.
Gene Name	Ensembl ID	log2FC	p value	p adj	Gene description
DNAJA4	ENSMMUG00000014204	4.34572	1.11129e-06	0.00768169	DnaJ heat shock protein family (Hsp40) member A4
-	ENSMMUG00000038412	-5.34482	1.13702e-06	0.00768169	phylloquinone omega-hydroxylase CYP4F2
HES2	ENSMMUG00000022882	-0.791063	3.70163e-06	0.0127754	hes family bHLH transcription factor 2
SLC34A3	ENSMMUG00000060673	-1.66517	3.78195e-06	0.0127754	solute carrier family 34 member 3
EFCAB8	ENSMMUG00000037750	-3.41676	1.38168e-05	0.0373386	EF-hand calcium binding domain 8
SHANK3	ENSMMUG00000005588	0.737026	3.51583e-05	0.0786934	SH3 and multiple ankyrin repeat domains 3
CCL2	ENSMMUG00000000288	-2.20983	4.07677e-05	0.0786934	C-C motif chemokine ligand 2
PTGER4	ENSMMUG00000016167	-2.19646	4.96261e-05	0.0838185	prostaglandin E receptor 4
PPP1R12C	ENSMMUG00000021965	-1.71267	6.15336e-05	0.0923824	protein phosphatase 1 regulatory subunit 12C
DENND3	ENSMMUG00000013578	1.31039	7.82735e-05	0.0976142	DENN domain containing 3
NDNF	ENSMMUG00000013989	0.918331	7.94669e-05	0.0976142	neuron derived neurotrophic factor
GHR	ENSMMUG00000001336	-1.8431	0.000104753	0.117952	growth hormone receptor
SLC4A4	ENSMMUG00000016029	3.39811	0.000126903	0.129644	solute carrier family 4 member 4
REPS2	ENSMMUG00000010598	0.977056	0.00014154	0.129644	RALBP1 associated Eps domain containing 2
KCNMB4	ENSMMUG00000014858	2.16209	0.000152112	0.129644	potassium calcium-activated channel subfamily M regulatory beta subunit 4
TM4SF19	ENSMMUG00000017310	-3.56218	0.000153515	0.129644	transmembrane 4 L six family member 19
CPLX1	ENSMMUG00000005016	-0.947285	0.000187436	0.148979	complexin 1
CCDC9B	ENSMMUG00000020539	-1.53078	0.000235022	0.176423	coiled-coil domain containing 9B
STOM	ENSMMUG00000013024	1.17218	0.000263824	0.18762	stomatin
BEX1	ENSMMUG00000002173	-1.87789	0.000299212	0.202148	brain expressed X-linked 1
CLEC1A	ENSMMUG00000005832	0.743802	0.000325345	0.20569	C-type lectin domain family 1 member A
BTBD10	ENSMMUG00000009695	-0.5451	0.0003349	0.20569	BTB domain containing 10
MPST	ENSMMUG00000012350	-0.679331	0.00035265	0.207174	mercaptopyruvate sulfurtransferase
TIPARP	ENSMMUG00000000366	0.884895	0.000384844	0.216667	TCDD inducible poly(ADP-ribose) polymerase
TNFRSF1B	ENSMMUG00000021447	0.540281	0.00043139	0.226998	TNF receptor superfamily member 1B
PIK3R1	ENSMMUG00000011532	0.754206	0.000470649	0.226998	phosphoinositide-3-kinase regulatory subunit 1
CCN1	ENSMMUG00000013197	0.806728	0.000476958	0.226998	cellular communication network factor 1
UNC119B	ENSMMUG00000065224	0.531107	0.000478622	0.226998	unc-119 lipid binding chaperone B
WSCD1	ENSMMUG00000010014	1.46598	0.000487192	0.226998	WSC domain containing 1
RAB27A	ENSMMUG00000020694	-1.28314	0.000508378	0.228974	RAB27A, member RAS oncogene family
TST	ENSMMUG00000012349	-0.8726	0.00053377	0.230416	thiosulfate sulfurtransferase
FAM167A	ENSMMUG00000021191	1.18826	0.000545686	0.230416	family with sequence similarity 167 member A
MAP6D1	ENSMMUG00000019824	2.0559	0.000573401	0.234781	MAP6 domain containing 1
EHBP1	ENSMMUG00000016668	-0.686114	0.000645987	0.256723	EH domain binding protein 1
-	ENSMMUG00000060973	-0.866999	0.000697895	0.269427	-
AKAP7	ENSMMUG00000000577	-0.789432	0.000723597	0.27159	A-kinase anchoring protein 7
HSPH1	ENSMMUG00000013707	1.5874	0.000793891	0.284728	heat shock protein family H (Hsp110) member 1
-	ENSMMUG00000019566	0.888334	0.000800744	0.284728	hemoglobin subunit alpha 1
AASS	ENSMMUG00000044304	-1.16932	0.000856457	0.294289	aminoadipate-semialdehyde synthase
IDI1	ENSMMUG00000017115	-0.981792	0.000891269	0.294289	isopentenyl-diphosphate delta isomerase 1
-	ENSMMUG00000050506	-1.6434	0.000898108	0.294289	-
OLFML2B	ENSMMUG00000023042	0.877432	0.000914752	0.294289	olfactomedin like 2B
GPX5	ENSMMUG00000004618	3.87315	0.000952441	1	glutathione peroxidase 5
CYP2B6	ENSMMUG00000018363	-2.36813	0.000969593	0.304678	cytochrome P450, family 2, subfamily B, polypeptide 6
CC2D2B	ENSMMUG00000016687	4.33193	0.00102369	1	coiled-coil and C2 domain containing 2B
ZNF19	ENSMMUG00000008408	2.43793	0.00106929	1	zinc finger protein 19
MYO7B	ENSMMUG00000004177	3.23333	0.00117024	1	myosin VIIB
PHYHD1	ENSMMUG00000032026	-3.40099	0.00121948	0.37449	phytanoyl-CoA dioxygenase domain containing 1
DRD1	ENSMMUG00000005147	3.7641	0.00125031	1	dopamine receptor D1
RASD2	ENSMMUG00000061659	1.56206	0.00127565	0.378979	RASD family member 2
TNFRSF6B	ENSMMUG00000045470	2.44292	0.00129019	0.378979	TNF receptor superfamily member 6b
C7H15orf39	ENSMMUG00000008529	1.07993	0.00134538	0.379512	chromosome 7 C15orf39 homolog
TYRO3	ENSMMUG00000013803	-0.614594	0.00134818	0.379512	TYRO3 protein tyrosine kinase
LMO1	ENSMMUG00000015017	5.10353	0.00136941	1	LIM domain only 1
-	ENSMMUG00000056177	-1.7489	0.00143779	0.396477	-
EPHB6	ENSMMUG00000016218	-0.818316	0.00163121	0.440819	EPH receptor B6
SLC1A4	ENSMMUG00000010279	-1.60847	0.00168939	0.447267	solute carrier family 1 member 4
ADAMTS9	ENSMMUG00000000265	1.06339	0.00172127	0.447267	ADAM metallopeptidase with thrombospondin type 1 motif 9
SDR16C5	ENSMMUG00000014810	-0.746208	0.00179256	0.4541	short chain dehydrogenase/reductase family 16C member 5
U4	ENSMMUG00000035191	4.15689	0.00180097	1	U4 spliceosomal RNA
-	ENSMMUG00000052310	-1.39162	0.00181479	0.4541	-
EDAR	ENSMMUG00000019574	-2.44863	0.00188276	0.462543	ectodysplasin A receptor
JUN	ENSMMUG00000059326	0.958256	0.0019875	0.479555	Jun proto-oncogene, AP-1 transcription factor subunit
-	ENSMMUG00000063679	2.35744	0.00210704	0.49948	-
BBOX1	ENSMMUG00000000316	1.74511	0.00219237	0.50771	gamma-butyrobetaine hydroxylase 1
SELENOH	ENSMMUG00000002566	-4.23924	0.00221691	0.50771	selenoprotein H
FBLN1	ENSMMUG00000002424	-0.433447	0.00226381	0.50981	fibulin 1
LRRC17	ENSMMUG00000012432	4.8974	0.00227224	1	leucine rich repeat containing 17
PROSER2	ENSMMUG00000023632	1.17013	0.00234684	0.519844	proline and serine rich 2
KCND3	ENSMMUG00000050825	-4.94715	0.00239601	1	potassium voltage-gated channel subfamily D member 3
IRS1	ENSMMUG00000019467	-0.965071	0.00246721	0.537694	insulin receptor substrate 1
PLXNC1	ENSMMUG00000018237	0.865037	0.00258959	0.555171	plexin C1
TTC13	ENSMMUG00000005888	0.573608	0.00264983	0.555171	tetratricopeptide repeat domain 13
SLC35G1	ENSMMUG00000045531	-0.851889	0.00267067	0.555171	solute carrier family 35 member G1
GABRP	ENSMMUG00000000570	0.845122	0.0027277	0.558434	gamma-aminobutyric acid type A receptor pi subunit
FBXW7	ENSMMUG00000020330	0.487265	0.00277862	0.560368	F-box and WD repeat domain containing 7
DACH2	ENSMMUG00000016777	-5.35512	0.00279728	1	dachshund family transcription factor 2
FAM171A2	ENSMMUG00000041006	1.81385	0.00283199	0.562733	family with sequence similarity 171 member A2
JAM3	ENSMMUG00000007100	0.997756	0.00296673	0.580963	junctional adhesion molecule 3
PBX3	ENSMMUG00000013763	0.570584	0.00313297	0.596807	PBX homeobox 3
PALD1	ENSMMUG00000021618	1.45932	0.00313598	0.596807	phosphatase domain containing paladin 1
KCNK13	ENSMMUG00000011151	5.0571	0.00328318	1	potassium two pore domain channel subfamily K member 13
PRKD3	ENSMMUG00000016438	0.698741	0.00329658	0.61177	protein kinase D3
MAPT	ENSMMUG00000004122	-0.895634	0.00330515	0.61177	microtubule associated protein tau
PSEN2	ENSMMUG00000018525	-0.784033	0.00351178	0.641232	presenilin 2
GPR37	ENSMMUG00000010664	-0.792902	0.00357047	0.643256	G protein-coupled receptor 37
RUNX3	ENSMMUG00000002420	2.78354	0.00361436	1	RUNX family transcription factor 3
SNTB1	ENSMMUG00000002607	-0.56625	0.00365997	0.648538	syntrophin beta 1
USP31	ENSMMUG00000009845	0.963765	0.00369579	0.648538	ubiquitin specific peptidase 31
STRIP2	ENSMMUG00000019359	1.48204	0.00377307	0.650454	striatin interacting protein 2
KCNK1	ENSMMUG00000022429	0.795396	0.00384855	0.650454	potassium two pore domain channel subfamily K member 1
-	ENSMMUG00000060041	-1.27785	0.00390278	0.650454	-
-	ENSMMUG00000061959	0.832153	0.00396039	0.650454	interferon-induced transmembrane protein 1
SFT2D2	ENSMMUG00000005283	-1.2533	0.00398605	0.650454	SFT2 domain containing 2
PSD2	ENSMMUG00000014636	-1.39166	0.0041022	0.650454	pleckstrin and Sec7 domain containing 2
FKBP4	ENSMMUG00000007405	0.60271	0.00414248	0.650454	FKBP prolyl isomerase 4
LPL	ENSMMUG00000004712	2.74686	0.0042476	0.650454	lipoprotein lipase
FRG1	ENSMMUG00000001824	-0.655084	0.00429465	0.650454	FSHD region gene 1
MICAL2	ENSMMUG00000020953	0.52195	0.00434855	0.650454	F-actin-monooxygenase MICAL2
SYNGR3	ENSMMUG00000007960	-0.730098	0.00438015	0.650454	synaptogyrin 3
SMAD3	ENSMMUG00000015455	0.537603	0.00438294	0.650454	SMAD family member 3
KRT24	ENSMMUG00000023592	3.1513	0.00438429	1	keratin, type I cytoskeletal 24
ACKR4	ENSMMUG00000051713	-1.09659	0.00439528	0.650454	atypical chemokine receptor 4
C1H1orf198	ENSMMUG00000005886	0.512088	0.00442262	0.650454	chromosome 1 C1orf198 homolog
DUSP16	ENSMMUG00000018580	-0.453871	0.00442878	0.650454	dual specificity phosphatase 16
CST6	ENSMMUG00000056794	-4.05302	0.00448429	0.651524	cystatin E/M
INHBB	ENSMMUG00000060196	-1.86997	0.00454527	0.653091	inhibin subunit beta B
PCDH10	ENSMMUG00000023149	-0.936026	0.00462298	0.653091	protocadherin 10
LYPD5	ENSMMUG00000059642	2.20864	0.00466334	0.653091	LY6/PLAUR domain containing 5
ZNF366	ENSMMUG00000003586	0.932097	0.00468841	0.653091	zinc finger protein 366
-	ENSMMUG00000057491	1.7825	0.00487203	1	-
ELFN1	ENSMMUG00000003283	1.4658	0.00487623	0.668578	extracellular leucine rich repeat and fibronectin type III domain containing 1
KIAA1109	ENSMMUG00000004571	-0.541441	0.00489855	0.668578	KIAA1109 ortholog
-	ENSMMUG00000007819	4.23032	0.00505322	1	transglutaminase 3
-	ENSMMUG00000065276	2.91558	0.00531092	1	-
RNF103	ENSMMUG00000015778	-0.334129	0.00542097	0.732181	ring finger protein 103
-	ENSMMUG00000061903	2.54451	0.00545358	1	-
PLIN2	ENSMMUG00000013997	2.50228	0.00547293	0.732181	perilipin-2
-	ENSMMUG00000051943	-1.96059	0.00555005	0.735219	-
DSC3	ENSMMUG00000007668	-0.994276	0.00561957	0.735252	desmocollin 3
-	ENSMMUG00000056711	-0.920034	0.00565913	0.735252	ribonuclease inhibitor-like
ARRDC3	ENSMMUG00000003569	1.2863	0.00574738	0.739605	arrestin domain containing 3
LDB2	ENSMMUG00000023116	0.779918	0.00595226	0.751878	LIM domain binding 2
PPP1R18	ENSMMUG00000019961	0.749466	0.00595404	0.751878	protein phosphatase 1 regulatory subunit 18
EPHA7	ENSMMUG00000014867	-2.83948	0.00597482	1	EPH receptor A7
CCDC167	ENSMMUG00000011575	1.85532	0.00626115	1	coiled-coil domain containing 167
-	ENSMMUG00000049544	1.22542	0.00627686	0.785305	-
-	ENSMMUG00000055560	-4.25583	0.00630267	1	-
PLOD3	ENSMMUG00000006949	0.858252	0.00641119	0.794752	procollagen-lysine,2-oxoglutarate 5-dioxygenase 3
KLK15	ENSMMUG00000001991	-3.66007	0.00648027	1	kallikrein related peptidase 15
TLR5	ENSMMUG00000000870	1.26164	0.00650466	0.799008	toll like receptor 5
PLPP1	ENSMMUG00000030099	-0.615437	0.00669489	0.814967	phospholipid phosphatase 1
-	ENSMMUG00000049854	-3.46565	0.00676747	0.816447	-
U6	ENSMMUG00000028428	4.18376	0.00681264	1	U6 spliceosomal RNA
SOSTDC1	ENSMMUG00000016817	-4.03171	0.00692799	1	sclerostin domain containing 1
CNTNAP2	ENSMMUG00000015772	1.12803	0.00706719	0.8229	contactin associated protein 2
ZMAT5	ENSMMUG00000064854	-0.729523	0.00712979	0.8229	zinc finger matrin-type 5
CEP55	ENSMMUG00000014708	0.777717	0.00717395	0.8229	centrosomal protein 55
PSD3	ENSMMUG00000016385	-0.912063	0.00719069	0.8229	pleckstrin and Sec7 domain containing 3
EID2	ENSMMUG00000032241	0.666461	0.00725818	0.8229	EP300 interacting inhibitor of differentiation 2
CHI3L2	ENSMMUG00000002455	-0.988496	0.00731832	0.8229	chitinase 3 like 2
-	ENSMMUG00000059665	-3.01952	0.00732668	1	-
-	ENSMMUG00000000397	-0.791314	0.0073827	0.8229	AFG3-like protein 1
BPIFB1	ENSMMUG00000062078	-1.00737	0.00746211	0.8229	BPI fold containing family B member 1
TGFBR3L	ENSMMUG00000042364	-1.36481	0.00746809	0.8229	transforming growth factor beta receptor 3 like
TNRC6B	ENSMMUG00000021345	-0.58057	0.00750144	0.8229	trinucleotide repeat containing adaptor 6B
-	ENSMMUG00000017297	-1.08297	0.0075725	0.8229	neutral sphingomyelinase activation associated factor
-	ENSMMUG00000048215	-0.581751	0.00761588	0.8229	-
SLC3A2	ENSMMUG00000020354	-0.493615	0.00761803	0.8229	solute carrier family 3 member 2
MANEA	ENSMMUG00000012202	0.548474	0.00767358	0.8229	mannosidase endo-alpha
SEC61A1	ENSMMUG00000018661	-0.334759	0.00775971	0.825584	SEC61 translocon alpha 1 subunit
FMN1	ENSMMUG00000029785	0.78874	0.00782123	0.825628	formin 1
-	ENSMMUG00000054951	1.35526	0.00806499	0.844761	-
RETREG3	ENSMMUG00000016796	-0.407225	0.00813174	0.845156	reticulophagy regulator family member 3
MATN3	ENSMMUG00000001579	1.26365	0.00819386	0.845156	matrilin 3
-	ENSMMUG00000054504	-0.667177	0.00832129	0.848521	-
EML1	ENSMMUG00000011706	0.586023	0.00846654	0.848521	EMAP like 1
GPR153	ENSMMUG00000057977	1.18958	0.00851866	0.848521	G protein-coupled receptor 153
CD209	ENSMMUG00000022463	1.17716	0.00852604	0.848521	C-type lectin CD209L2
HSPB1	ENSMMUG00000056744	0.547171	0.00857117	0.848521	heat shock protein family B (small) member 1
YARS2	ENSMMUG00000013654	0.377735	0.00863203	0.848521	tyrosyl-tRNA synthetase 2
XAGE2	ENSMMUG00000040002	-1.32034	0.00872201	0.848521	X antigen family member 2
-	ENSMMUG00000063859	-1.17565	0.00872887	0.848521	-
ATP1B2	ENSMMUG00000044486	0.935709	0.00886326	0.849394	ATPase Na+/K+ transporting subunit beta 2
KLF7	ENSMMUG00000000190	0.979484	0.00890313	0.849394	Kruppel like factor 7
PJA1	ENSMMUG00000047336	-0.643559	0.00899172	0.849394	praja ring finger ubiquitin ligase 1
ANGPT4	ENSMMUG00000000270	4.32998	0.00902719	1	angiopoietin 4
MAP1LC3B	ENSMMUG00000050432	-0.695376	0.00905764	0.849394	microtubule associated protein 1 light chain 3 beta
IQCK	ENSMMUG00000002708	1.19032	0.00907207	0.849394	IQ motif containing K
-	ENSMMUG00000055585	2.3723	0.00911619	1	-
MYOZ1	ENSMMUG00000013696	1.88349	0.00912149	1	myozenin 1
TRPC3	ENSMMUG00000009820	-1.77135	0.00913349	0.849394	transient receptor potential cation channel subfamily C member 3
PDK4	ENSMMUG00000021389	-0.386904	0.00917788	0.849394	pyruvate dehydrogenase kinase 4
Metazoa_SRP	ENSMMUG00000057321	3.00185	0.00922074	1	Metazoan signal recognition particle RNA
-	ENSMMUG00000032150	-1.06647	0.00927178	0.852247	-
SLC46A1	ENSMMUG00000019151	-0.678086	0.00939363	0.857613	solute carrier family 46 member 1
-	ENSMMUG00000051971	-1.55228	0.00955184	1	-
CKMT2	ENSMMUG00000006932	4.01042	0.00969168	1	creatine kinase, mitochondrial 2
ADAM28	ENSMMUG00000005317	3.10369	0.00979273	0.874944	ADAM metallopeptidase domain 28
TLE1	ENSMMUG00000003718	-0.758512	0.00981219	0.874944	TLE family member 1, transcriptional corepressor
RBM20	ENSMMUG00000019883	-2.12584	0.00982369	1	RNA binding motif protein 20
SPRY4	ENSMMUG00000014175	0.731191	0.00990321	0.874944	sprouty RTK signaling antagonist 4
CCDC85C	ENSMMUG00000046816	0.885547	0.00993181	0.874944	coiled-coil domain containing 85C
DYSF	ENSMMUG00000007176	0.718695	0.00999261	0.874944	dysferlin
-	ENSMMUG00000052381	-1.30222	0.0101704	0.874944	-
BCL6B	ENSMMUG00000016268	1.04833	0.0102336	0.874944	BCL6B transcription repressor
HELZ2	ENSMMUG00000006070	0.874512	0.0104717	0.874944	helicase with zinc finger 2
RNF152	ENSMMUG00000041998	1.40702	0.0105324	0.874944	ring finger protein 152
BICD2	ENSMMUG00000001061	-0.360908	0.0105717	0.874944	BICD cargo adaptor 2
RGS1	ENSMMUG00000003486	1.27797	0.0106052	0.874944	regulator of G protein signaling 1
WDCP	ENSMMUG00000012340	0.804172	0.01062	0.874944	WD repeat and coiled coil containing
MUC20	ENSMMUG00000008355	-3.33115	0.0106446	1	mucin 20, cell surface associated
TNS3	ENSMMUG00000019393	-0.354148	0.0106488	0.874944	tensin 3
ADGRL2	ENSMMUG00000002516	0.644816	0.0106552	0.874944	adhesion G protein-coupled receptor L2
-	ENSMMUG00000020050	1.81158	0.0106607	0.874944	salt inducible kinase 1
ACVRL1	ENSMMUG00000004982	-0.377107	0.0106994	0.874944	activin A receptor like type 1
THSD7B	ENSMMUG00000017081	1.4205	0.0107624	0.874944	thrombospondin type 1 domain containing 7B
SKIV2L	ENSMMUG00000000736	-0.397105	0.010777	0.874944	Ski2 like RNA helicase
-	ENSMMUG00000064937	-1.21045	0.0109449	0.874944	-
-	ENSMMUG00000062837	3.21131	0.0109486	1	-
-	ENSMMUG00000000729	-0.871455	0.0109498	0.874944	complement factor B
S100A13	ENSMMUG00000057586	-0.491204	0.0109573	0.874944	S100 calcium binding protein A13
SLC2A5	ENSMMUG00000016307	-0.892796	0.011008	0.874944	solute carrier family 2 member 5
MS4A8	ENSMMUG00000011166	2.29279	0.0110664	1	membrane spanning 4-domains A8
DNAJB13	ENSMMUG00000041012	2.61331	0.0112208	1	DnaJ heat shock protein family (Hsp40) member B13
FAM20A	ENSMMUG00000002195	1.06436	0.0112753	0.875843	FAM20A golgi associated secretory pathway pseudokinase
-	ENSMMUG00000055978	1.93344	0.0113263	1	-
SLC9A3R2	ENSMMUG00000002806	0.701926	0.011336	0.875843	SLC9A3 regulator 2
OSBPL7	ENSMMUG00000019039	1.22892	0.0113677	0.875843	oxysterol binding protein like 7
XRCC2	ENSMMUG00000002878	-0.714739	0.0113879	0.875843	X-ray repair cross complementing 2
KIFAP3	ENSMMUG00000010081	0.422496	0.0113993	0.875843	kinesin associated protein 3
NADK2	ENSMMUG00000015226	-0.422646	0.0114158	0.875843	NAD kinase 2, mitochondrial
-	ENSMMUG00000017109	-0.876772	0.0114731	0.875843	-
SPIN1	ENSMMUG00000016295	-0.418934	0.0117208	0.888665	spindlin 1
HBA	ENSMMUG00000029310	0.711442	0.0117726	0.888665	hemoglobin, alpha 2
TM4SF1	ENSMMUG00000052736	0.588008	0.0118891	0.892477	transmembrane 4 L six family member 1
-	ENSMMUG00000061499	1.87128	0.0119278	1	-
ZNF575	ENSMMUG00000019265	3.57567	0.0120541	1	zinc finger protein 575
-	ENSMMUG00000054772	0.920421	0.0121096	0.893167	-
RAD51C	ENSMMUG00000009133	0.622162	0.0121918	0.893167	RAD51 paralog C
CHMP6	ENSMMUG00000060324	-0.419268	0.0122834	0.893167	charged multivesicular body protein 6
DCDC2C	ENSMMUG00000023273	-3.89783	0.0122889	1	doublecortin domain containing 2C
PDIA5	ENSMMUG00000007696	0.488564	0.0123454	0.893167	protein disulfide isomerase family A member 5
CELSR1	ENSMMUG00000020993	-0.439415	0.0123636	0.893167	cadherin EGF LAG seven-pass G-type receptor 1
CRTAM	ENSMMUG00000002922	3.93383	0.0124194	1	cytotoxic and regulatory T cell molecule
ALG5	ENSMMUG00000003585	-0.348963	0.012454	0.893167	ALG5 dolichyl-phosphate beta-glucosyltransferase
PPP1R14C	ENSMMUG00000022110	-0.528971	0.0124545	0.893167	protein phosphatase 1 regulatory inhibitor subunit 14C
HERPUD1	ENSMMUG00000019189	-0.435484	0.0125203	0.893167	homocysteine inducible ER protein with ubiquitin like domain 1
MOB3A	ENSMMUG00000010984	1.83054	0.0125293	0.893167	MOB kinase activator 3A
RAB5C	ENSMMUG00000014756	0.354899	0.0125668	0.893167	lysine acetyltransferase 2A
TMEM182	ENSMMUG00000004169	2.0078	0.0126145	1	transmembrane protein 182
ETS1	ENSMMUG00000020706	0.660779	0.0126991	0.893167	ETS proto-oncogene 1, transcription factor
FAM83C	ENSMMUG00000018210	2.87966	0.0127016	1	family with sequence similarity 83 member C
-	ENSMMUG00000050855	3.92545	0.0127143	1	beta-defensin 4A-like
LMCD1	ENSMMUG00000001814	-1.06601	0.0127288	0.893167	LIM and cysteine rich domains 1
MSANTD2	ENSMMUG00000008488	0.578708	0.0128819	0.893167	Myb/SANT DNA binding domain containing 2
SH3PXD2B	ENSMMUG00000010102	-0.479568	0.0128855	0.893167	SH3 and PX domains 2B
TMEM155	ENSMMUG00000001752	0.538821	0.0128898	0.893167	transmembrane protein 155
DDX53	ENSMMUG00000022142	3.37291	0.0129362	1	DEAD-box helicase 53
CCRL2	ENSMMUG00000014260	1.65881	0.0129706	0.89418	C-C motif chemokine receptor like 2
PDP1	ENSMMUG00000004568	-0.553999	0.0130771	0.894799	pyruvate dehyrogenase phosphatase catalytic subunit 1
-	ENSMMUG00000059649	4.86338	0.013119	1	-
TVP23A	ENSMMUG00000061818	-3.7079	0.0131323	1	trans-golgi network vesicle protein 23 homolog A
TNFRSF10B	ENSMMUG00000048076	1.64716	0.0131737	0.894799	TNF receptor superfamily member 10b
ABHD4	ENSMMUG00000009441	-0.378037	0.0131927	0.894799	abhydrolase domain containing 4
LRP3	ENSMMUG00000022872	-1.22933	0.0132445	0.894799	LDL receptor related protein 3
FFAR4	ENSMMUG00000014710	3.16456	0.0133939	1	free fatty acid receptor 4
SLCO3A1	ENSMMUG00000001740	0.897957	0.0134181	0.90202	solute carrier organic anion transporter family member 3A1
SPESP1	ENSMMUG00000063939	3.51415	0.0134285	1	sperm equatorial segment protein 1
KLF2	ENSMMUG00000028855	0.979061	0.0135846	0.908686	Kruppel like factor 2
TRIB2	ENSMMUG00000038615	0.645228	0.0137081	0.91243	tribbles pseudokinase 2
TFE3	ENSMMUG00000023494	-0.337316	0.0138931	0.92021	transcription factor binding to IGHM enhancer 3
WASF1	ENSMMUG00000014764	0.752271	0.0139848	0.921767	WASP family member 1
-	ENSMMUG00000005404	-3.49103	0.0141742	1	zinc finger protein 25-like
-	ENSMMUG00000057913	1.52873	0.0141799	0.92775	-
DMXL2	ENSMMUG00000000754	0.62259	0.0142129	0.92775	Dmx like 2
-	ENSMMUG00000057656	0.701863	0.0143327	0.931074	-
RSRP1	ENSMMUG00000002970	1.07027	0.0145402	0.940035	arginine and serine rich protein 1
RARRES1	ENSMMUG00000014825	-1.06087	0.0146493	0.942581	retinoic acid receptor responder 1
-	ENSMMUG00000055937	4.12473	0.0146729	1	-
-	ENSMMUG00000052437	3.34078	0.0147453	1	-
PLCE1	ENSMMUG00000001608	0.775907	0.0147616	0.945304	phospholipase C epsilon 1
AARS1	ENSMMUG00000021653	-0.416054	0.014898	0.947581	alanyl-tRNA synthetase 1
MIRLET7A3	ENSMMUG00000027003	-2.09638	0.0151297	1	microRNA let-7a-3
ANKS1B	ENSMMUG00000022406	1.42716	0.0151632	0.947581	ankyrin repeat and sterile alpha motif domain containing 1B
C2H3orf49	ENSMMUG00000012780	-1.65347	0.0151856	0.947581	chromosome 2 C3orf49 homolog
-	ENSMMUG00000002917	1.23759	0.015239	0.947581	single Ig IL-1-related receptor
P2RX6	ENSMMUG00000020476	-0.990514	0.015281	0.947581	purinergic receptor P2X 6
CACNA1A	ENSMMUG00000003555	-1.22546	0.0153449	0.947581	calcium voltage-gated channel subunit alpha1 A
TESPA1	ENSMMUG00000016203	2.0807	0.0153463	1	thymocyte expressed, positive selection associated 1
NR4A1	ENSMMUG00000022922	0.868002	0.0155961	0.947581	nuclear receptor subfamily 4 group A member 1
-	ENSMMUG00000021945	-0.583926	0.0156379	0.947581	EPS8 like 1
LAYN	ENSMMUG00000030915	0.748805	0.0157125	0.947581	layilin
RABL3	ENSMMUG00000001594	-0.351232	0.0157213	0.947581	RAB, member of RAS oncogene family like 3
AGFG2	ENSMMUG00000048302	-0.549223	0.0157764	0.947581	ArfGAP with FG repeats 2
KLF14	ENSMMUG00000012491	-1.69043	0.0158518	1	Kruppel like factor 14
-	ENSMMUG00000061038	0.877191	0.0158625	0.947581	-
TCF20	ENSMMUG00000002656	-0.373073	0.0158655	0.947581	transcription factor 20
LGALS13	ENSMMUG00000004245	-1.32881	0.0160436	0.947581	galactoside-binding soluble lectin 13
BACH2	ENSMMUG00000009736	-0.834571	0.0160608	0.947581	BTB domain and CNC homolog 2
BNIPL	ENSMMUG00000010071	2.01233	0.0161513	1	BCL2 interacting protein like
-	ENSMMUG00000050312	4.1892	0.0161631	1	-
-	ENSMMUG00000051358	1.69827	0.0161906	1	uncharacterized protein CXorf21-like
ZNF613	ENSMMUG00000023136	0.587253	0.0162678	0.947581	zinc finger protein 613
RSPO4	ENSMMUG00000031223	4.18954	0.0162799	1	R-spondin 4
PVR	ENSMMUG00000063402	-0.760567	0.016305	0.947581	poliovirus receptor
ATP2B3	ENSMMUG00000011478	-1.40781	0.0163232	0.947581	ATPase plasma membrane Ca2+ transporting 3
NAIP	ENSMMUG00000020215	0.840664	0.0163427	0.947581	NLR family apoptosis inhibitory protein
SCN10A	ENSMMUG00000015827	-1.33027	0.0163597	0.947581	sodium voltage-gated channel alpha subunit 10
EFR3B	ENSMMUG00000016461	-0.399736	0.0163702	0.947581	EFR3 homolog B
MAGI1	ENSMMUG00000017510	0.801189	0.0163779	0.947581	membrane associated guanylate kinase, WW and PDZ domain containing 1
AATK	ENSMMUG00000015514	1.14029	0.0164536	0.947581	apoptosis associated tyrosine kinase
ZNF44	ENSMMUG00000049646	0.434394	0.0164803	0.947581	zinc finger protein 44
MOXD1	ENSMMUG00000004996	2.65107	0.0166231	1	monooxygenase DBH like 1
MLXIPL	ENSMMUG00000030377	-3.42768	0.0166946	1	MLX interacting protein like
ARMC10	ENSMMUG00000012435	0.447888	0.0167444	0.954578	armadillo repeat containing 10
TNNC1	ENSMMUG00000005618	-1.18496	0.0168	0.954578	troponin C1, slow skeletal and cardiac type
CNTFR	ENSMMUG00000020780	1.02257	0.0168139	0.954578	ciliary neurotrophic factor receptor
ATP23	ENSMMUG00000060302	-0.561779	0.0169087	0.955192	ATP23 metallopeptidase and ATP synthase assembly factor homolog
DDAH1	ENSMMUG00000014573	0.771155	0.0171037	0.955192	dimethylarginine dimethylaminohydrolase 1
VTA1	ENSMMUG00000023012	-0.408094	0.0171065	0.955192	vesicle trafficking 1
-	ENSMMUG00000018256	-0.681384	0.0171075	0.955192	-
PDZK1IP1	ENSMMUG00000061850	1.19635	0.0172257	0.956302	TAL bHLH transcription factor 1, erythroid differentiation factor
-	ENSMMUG00000058705	4.58272	0.0174945	1	-
SLC17A9	ENSMMUG00000005713	-0.905907	0.0175332	0.956302	solute carrier family 17 member 9
CCDC81	ENSMMUG00000013045	3.55386	0.0175695	1	coiled-coil domain containing 81
ABLIM3	ENSMMUG00000021657	0.688395	0.0175884	0.956302	actin binding LIM protein family member 3
RASSF5	ENSMMUG00000045607	0.867293	0.0175974	0.956302	Ras association domain family member 5
CDC42BPB	ENSMMUG00000008380	-0.272668	0.0176235	0.956302	CDC42 binding protein kinase beta
ANKRD24	ENSMMUG00000028928	-0.87377	0.0177365	0.956302	ankyrin repeat domain 24
ETV6	ENSMMUG00000014370	0.60915	0.0177497	0.956302	ETS variant transcription factor 6
SNORD1A	ENSMMUG00000026614	-3.47846	0.0177809	1	small nucleolar RNA, C/D box 1A
AFAP1L1	ENSMMUG00000021660	0.564177	0.017822	0.956302	actin filament associated protein 1 like 1
VWA7	ENSMMUG00000006827	2.40181	0.0178278	1	von Willebrand factor A domain containing 7
MYADM	ENSMMUG00000060177	0.853645	0.0178351	0.956302	myeloid associated differentiation marker
-	ENSMMUG00000062057	3.5268	0.0178513	1	-
SLC29A3	ENSMMUG00000006433	-0.402617	0.0179299	0.956302	solute carrier family 29 member 3
DNAH6	ENSMMUG00000019116	-0.92792	0.0180232	0.956302	dynein axonemal heavy chain 6
HBB	ENSMMUG00000041831	0.660165	0.0180599	0.956302	hemoglobin subunit epsilon 1
SLC2A4	ENSMMUG00000022709	-1.55397	0.0181592	0.956302	solute carrier family 2 member 4
VCAN	ENSMMUG00000011513	0.791801	0.0181893	0.956302	versican
-	ENSMMUG00000062566	-0.945607	0.0183573	0.956302	-
SH2B3	ENSMMUG00000002223	0.593382	0.0183845	0.956302	SH2B adaptor protein 3
IDH3G	ENSMMUG00000003374	-0.414818	0.0184184	0.956302	isocitrate dehydrogenase (NAD(+)) 3 non-catalytic subunit gamma
SLC9A3R1	ENSMMUG00000005737	0.544502	0.018515	0.956302	SLC9A3 regulator 1
ASAP2	ENSMMUG00000018033	0.565608	0.0185297	0.956302	ArfGAP with SH3 domain, ankyrin repeat and PH domain 2
PHLPP1	ENSMMUG00000005145	-0.404435	0.0185582	0.956302	PH domain and leucine rich repeat protein phosphatase 1
SCARA3	ENSMMUG00000021517	-0.687884	0.0186688	0.956302	scavenger receptor class A member 3
SLC23A3	ENSMMUG00000000788	3.38379	0.0187268	1	solute carrier family 23 member 3
SLC2A3	ENSMMUG00000046124	1.753	0.0187493	0.956302	solute carrier family 2 (facilitated glucose transporter), member 3
-	ENSMMUG00000058660	1.26781	0.0188119	0.956302	-
CCDC178	ENSMMUG00000004328	-1.35167	0.0188708	0.956302	coiled-coil domain containing 178
PLXNA2	ENSMMUG00000004563	0.524925	0.0189434	0.956302	plexin A2
PITPNM1	ENSMMUG00000011821	-0.463643	0.0189675	0.956302	phosphatidylinositol transfer protein membrane associated 1
GPANK1	ENSMMUG00000005293	-0.399022	0.0191241	0.960043	G-patch domain and ankyrin repeats 1
ADH5	ENSMMUG00000003552	0.526654	0.0192664	0.960043	alcohol dehydrogenase 5 (class III), chi polypeptide
-	ENSMMUG00000059386	1.8609	0.0192708	0.960043	-
TACC2	ENSMMUG00000013033	-0.572505	0.0193322	0.960043	transforming acidic coiled-coil containing protein 2
RESF1	ENSMMUG00000023575	0.523018	0.019397	0.960043	retroelement silencing factor 1
FAM228A	ENSMMUG00000009407	2.05796	0.019504	1	family with sequence similarity 228 member A
-	ENSMMUG00000054405	1.74064	0.0196379	0.967756	-
SORBS1	ENSMMUG00000004818	0.469037	0.0197127	0.967756	sorbin and SH3 domain containing 1
-	ENSMMUG00000004234	-1.70729	0.0198979	1	-
IL11	ENSMMUG00000048355	-1.03335	0.0199366	0.967756	interleukin 11
DDIT4	ENSMMUG00000055226	1.09367	0.0199447	0.967756	DNA damage inducible transcript 4
FZD4	ENSMMUG00000004048	0.775649	0.0199673	0.967756	frizzled class receptor 4
MX2	ENSMMUG00000044257	1.02943	0.0199825	0.967756	MX dynamin like GTPase 2
RNASEH2A	ENSMMUG00000045010	-0.457022	0.0202788	0.976526	ribonuclease H2 subunit A
ADD3	ENSMMUG00000006233	0.46269	0.0203081	0.976526	adducin 3
TGFB3	ENSMMUG00000012069	0.475866	0.0205425	0.980573	transforming growth factor beta 3
MOSPD1	ENSMMUG00000022505	-0.451441	0.0205826	0.980573	motile sperm domain containing 1
CDC14A	ENSMMUG00000019106	0.740464	0.0206416	0.980573	cell division cycle 14A
TEAD2	ENSMMUG00000014791	1.11106	0.0206826	0.980573	TEA domain transcription factor 2
UFM1	ENSMMUG00000058145	-0.38971	0.0209427	0.984874	ubiquitin fold modifier 1
MACC1	ENSMMUG00000022683	-0.931404	0.0209857	0.984874	MET transcriptional regulator MACC1
GFRA2	ENSMMUG00000023361	1.79926	0.020992	0.984874	GDNF family receptor alpha 2
TSHZ2	ENSMMUG00000013035	3.50492	0.0210945	1	teashirt zinc finger homeobox 2
-	ENSMMUG00000050121	2.05382	0.0212207	1	-
INSL4	ENSMMUG00000058221	-0.24858	0.0213868	0.999183	insulin like 4
CRTAP	ENSMMUG00000009010	0.388061	0.021507	0.999183	cartilage associated protein
CD84	ENSMMUG00000015470	1.27118	0.0215853	0.999183	CD84 molecule
PLEKHO1	ENSMMUG00000013681	0.623549	0.0215928	0.999183	pleckstrin homology domain containing O1
-	ENSMMUG00000049789	-0.95637	0.0219498	0.999933	-
HSP90AA1	ENSMMUG00000054990	0.626237	0.0220427	0.999933	heat shock protein 90 alpha family class A member 1
TMED8	ENSMMUG00000056541	1.26896	0.0222535	0.999933	transmembrane p24 trafficking protein family member 8
DIPK1C	ENSMMUG00000015702	3.03786	0.022338	1	divergent protein kinase domain 1C
MSN	ENSMMUG00000015653	0.504022	0.0223789	0.999933	moesin
PCNX4	ENSMMUG00000015443	0.800666	0.0224562	0.999933	pecanex 4
LRRC38	ENSMMUG00000053824	-4.19106	0.022531	1	leucine rich repeat containing 38
PROM1	ENSMMUG00000008164	1.69691	0.0227947	0.999933	prominin 1
LCP2	ENSMMUG00000014126	0.960316	0.0230375	0.999933	lymphocyte cytosolic protein 2
TENT4A	ENSMMUG00000013189	1.02503	0.0230516	0.999933	terminal nucleotidyltransferase 4A
GPR137B	ENSMMUG00000014263	0.608445	0.0230768	0.999933	G protein-coupled receptor 137B
RHBDL1	ENSMMUG00000001982	2.32106	0.0231214	1	rhomboid like 1
OPLAH	ENSMMUG00000004009	-0.629691	0.0232868	0.999933	5-oxoprolinase, ATP-hydrolysing
TENM2	ENSMMUG00000009116	0.794545	0.0236072	0.999933	teneurin transmembrane protein 2
CEBPA	ENSMMUG00000006124	1.83786	0.0236116	0.999933	CCAAT enhancer binding protein alpha
CLDN3	ENSMMUG00000001143	0.936853	0.0236353	0.999933	claudin 3
MCUB	ENSMMUG00000052933	0.529268	0.0237432	0.999933	mitochondrial calcium uniporter dominant negative subunit beta
NAT1	ENSMMUG00000005920	-0.886147	0.0237715	0.999933	N-acetyltransferase 1
-	ENSMMUG00000045847	1.19482	0.0237816	0.999933	PAGE family member 2B
CAMKK1	ENSMMUG00000020251	0.872015	0.0238106	0.999933	calcium/calmodulin dependent protein kinase kinase 1
XYLT1	ENSMMUG00000017131	-1.28429	0.0238827	0.999933	xylosyltransferase 1
PAQR9	ENSMMUG00000003927	-1.63211	0.0239255	0.999933	progestin and adipoQ receptor family member 9
PTPN5	ENSMMUG00000007133	3.12734	0.0239423	1	protein tyrosine phosphatase non-receptor type 5
KIFC3	ENSMMUG00000015696	0.760827	0.0239829	0.999933	kinesin family member C3
FAM111B	ENSMMUG00000010273	1.18004	0.0240422	0.999933	family with sequence similarity 111 member B
COL6A3	ENSMMUG00000014049	0.673358	0.0241184	0.999933	collagen type VI alpha 3 chain
DUSP6	ENSMMUG00000054968	0.92253	0.0241457	0.999933	dual specificity phosphatase 6
PLSCR4	ENSMMUG00000007976	0.563772	0.0243226	0.999933	phospholipid scramblase 4
KDSR	ENSMMUG00000006578	-0.280428	0.0244421	0.999933	3-ketodihydrosphingosine reductase
TMEM145	ENSMMUG00000012170	-0.902589	0.0245203	0.999933	transmembrane protein 145
ARL4A	ENSMMUG00000010846	-0.602614	0.0245576	0.999933	ADP ribosylation factor like GTPase 4A
VLDLR	ENSMMUG00000015093	0.472231	0.0245929	0.999933	very low density lipoprotein receptor
-	ENSMMUG00000047496	1.59546	0.0246401	0.999933	FSHD region gene 1
SLC4A10	ENSMMUG00000008384	3.07625	0.0246852	1	solute carrier family 4 member 10
FOXJ3	ENSMMUG00000014138	-0.402942	0.0247817	0.999933	forkhead box J3
POLD4	ENSMMUG00000004523	-0.407964	0.0248328	0.999933	DNA polymerase delta 4, accessory subunit
ESAM	ENSMMUG00000008486	0.452042	0.0249023	0.999933	endothelial cell adhesion molecule
ENPP4	ENSMMUG00000042260	0.511807	0.0249613	0.999933	ectonucleotide pyrophosphatase/phosphodiesterase 4
FERMT2	ENSMMUG00000010689	-0.28205	0.0250102	0.999933	fermitin family member 2
CAMK4	ENSMMUG00000011974	-1.07587	0.0250307	0.999933	calcium/calmodulin dependent protein kinase IV
RP2	ENSMMUG00000023018	0.507913	0.0250359	0.999933	RP2 activator of ARL3 GTPase
SFMBT2	ENSMMUG00000019194	1.06021	0.0251232	0.999933	Scm like with four mbt domains 2
C2CD4A	ENSMMUG00000060717	-1.4834	0.0251693	0.999933	C2 calcium dependent domain containing 4A
DMAC2L	ENSMMUG00000002615	-0.660409	0.0252862	0.999933	distal membrane arm assembly complex 2 like
STARD9	ENSMMUG00000008093	0.542526	0.0253312	0.999933	StAR related lipid transfer domain containing 9
-	ENSMMUG00000064371	-2.47474	0.0254475	1	-
-	ENSMMUG00000060517	2.78194	0.0255143	1	-
FZD7	ENSMMUG00000045285	-0.662349	0.0255146	0.999933	frizzled class receptor 7
-	ENSMMUG00000064692	0.822178	0.0255371	0.999933	60S ribosomal protein L14
SLC16A9	ENSMMUG00000008911	0.966577	0.0255775	0.999933	solute carrier family 16 member 9
PCK2	ENSMMUG00000021590	-0.836183	0.0256535	0.999933	phosphoenolpyruvate carboxykinase 2, mitochondrial
HOXC9	ENSMMUG00000063144	2.56224	0.0256677	1	homeobox C9
IRS2	ENSMMUG00000021790	-0.504023	0.0258751	0.999933	insulin receptor substrate 2
AXL	ENSMMUG00000009145	-0.473599	0.0258852	0.999933	AXL receptor tyrosine kinase
DUSP9	ENSMMUG00000056988	-0.447301	0.0259909	0.999933	dual specificity phosphatase 9
TEKT4	ENSMMUG00000051048	-1.52502	0.0260253	1	tektin 4
MTSS2	ENSMMUG00000020416	0.981266	0.0260466	0.999933	MTSS I-BAR domain containing 2
NT5E	ENSMMUG00000005442	-2.77205	0.02609	1	5'-nucleotidase ecto
REEP4	ENSMMUG00000059519	-0.558259	0.0262724	0.999933	receptor accessory protein 4
ZFP62	ENSMMUG00000042832	1.51388	0.0263175	0.999933	ZFP62 zinc finger protein
-	ENSMMUG00000062086	0.460224	0.0263412	0.999933	lymphocyte antigen 6 family member E
MSLN	ENSMMUG00000000835	3.27872	0.0263916	1	mesothelin
VWA3B	ENSMMUG00000021185	1.90386	0.0263942	0.999933	von Willebrand factor A domain containing 3B
CGNL1	ENSMMUG00000005179	0.539853	0.0264141	0.999933	cingulin like 1
TSC22D3	ENSMMUG00000057348	0.668895	0.0264203	0.999933	TSC22 domain family member 3
-	ENSMMUG00000052486	-0.747932	0.026429	0.999933	-
TERB2	ENSMMUG00000049868	-1.33927	0.0266668	1	telomere repeat binding bouquet formation protein 2
-	ENSMMUG00000055929	-1.16323	0.0266911	0.999933	-
PTAFR	ENSMMUG00000063261	0.853451	0.0267339	0.999933	platelet activating factor receptor
-	ENSMMUG00000002827	2.98127	0.0268027	1	collagen alpha-4(VI) chain-like
HOXA1	ENSMMUG00000012807	1.52273	0.0268626	1	homeobox A1
CDKN2B	ENSMMUG00000001134	0.952539	0.0270463	0.999933	cyclin-dependent kinase inhibitor 2A
LIG4	ENSMMUG00000008874	-0.602423	0.0270533	0.999933	DNA ligase 4
IQCN	ENSMMUG00000016354	-2.07639	0.0270922	1	IQ motif containing N
-	ENSMMUG00000040803	1.30906	0.0271025	0.999933	sarcalumenin
TMEM169	ENSMMUG00000053869	-3.94252	0.0271996	1	transmembrane protein 169
ERICH2	ENSMMUG00000031393	-1.56397	0.0272543	1	glutamate rich 2
FLNC	ENSMMUG00000006296	-0.78655	0.0272792	0.999933	filamin C
TMEM229B	ENSMMUG00000048801	-0.830949	0.027298	0.999933	transmembrane protein 229B
ANO4	ENSMMUG00000018718	1.58523	0.027385	0.999933	anoctamin 4
PCYT2	ENSMMUG00000012889	-0.405415	0.0274586	0.999933	phosphate cytidylyltransferase 2, ethanolamine
PRSS23	ENSMMUG00000003717	0.60191	0.0275332	0.999933	serine protease 23
-	ENSMMUG00000052120	2.11584	0.0276115	1	-
ZNF28	ENSMMUG00000047412	0.634584	0.0276354	0.999933	zinc finger protein 28
MECOM	ENSMMUG00000002242	0.76172	0.0276689	0.999933	MDS1 and EVI1 complex locus
-	ENSMMUG00000056329	-1.44424	0.0276939	0.999933	uncharacterized LOC106994766
-	ENSMMUG00000051667	-4.00392	0.0277062	1	-
EGF	ENSMMUG00000010043	1.76681	0.0278132	0.999933	epidermal growth factor
-	ENSMMUG00000062935	3.79508	0.027853	1	-
BCL6	ENSMMUG00000009198	-0.537094	0.0279176	0.999933	BCL6 transcription repressor
-	ENSMMUG00000055635	3.69249	0.0279422	1	-
-	ENSMMUG00000021848	-1.27623	0.0279657	0.999933	kynurenine aminotransferase 1
NPW	ENSMMUG00000020017	3.36465	0.027972	1	neuropeptide W
CCP110	ENSMMUG00000013334	0.660966	0.0280396	0.999933	centriolar coiled-coil protein 110
BCS1L	ENSMMUG00000006740	-0.392491	0.028042	0.999933	BCS1 homolog, ubiquinol-cytochrome c reductase complex chaperone
SYCP3	ENSMMUG00000063989	0.964682	0.028101	0.999933	synaptonemal complex protein 3
USP11	ENSMMUG00000016608	0.51355	0.0282377	0.999933	ubiquitin specific peptidase 11
ING1	ENSMMUG00000022818	0.901434	0.0285409	0.999933	inhibitor of growth family member 1
ANKRD44	ENSMMUG00000022425	0.57222	0.0285891	0.999933	ankyrin repeat domain 44
-	ENSMMUG00000017113	-0.418866	0.0285922	0.999933	ubiquitin specific peptidase 32
PPT1	ENSMMUG00000009189	0.378332	0.0286453	0.999933	palmitoyl-protein thioesterase 1
TLNRD1	ENSMMUG00000052973	-0.571462	0.0286727	0.999933	talin rod domain containing 1
PTPN22	ENSMMUG00000006786	-1.82327	0.0286824	1	protein tyrosine phosphatase non-receptor type 22
MAGEA10	ENSMMUG00000063217	-0.365609	0.0287007	0.999933	MAGE family member A10
ZNF23	ENSMMUG00000008405	0.726268	0.0287205	0.999933	zinc finger protein 23
FAM171A1	ENSMMUG00000015286	0.719898	0.0287476	0.999933	family with sequence similarity 171 member A1
C5orf46	ENSMMUG00000064447	-6.49395	0.0287643	0.999933	chromosome 6 C5orf46 homolog
ZNF524	ENSMMUG00000006774	-0.390636	0.0287889	0.999933	zinc finger protein 524
-	ENSMMUG00000031997	2.01736	0.0288534	1	-
NXPE2	ENSMMUG00000030902	1.4334	0.0289373	1	neurexophilin and PC-esterase domain family member 2
-	ENSMMUG00000001245	0.510982	0.029004	0.999933	zinc finger protein 532
AMOTL2	ENSMMUG00000021694	0.625988	0.0290233	0.999933	angiomotin like 2
ZNF444	ENSMMUG00000017498	-0.320906	0.0290622	0.999933	zinc finger protein 444
ZFP36L1	ENSMMUG00000044603	0.638957	0.0291698	0.999933	ZFP36 ring finger protein like 1
SEC14L1	ENSMMUG00000022994	0.461335	0.029182	0.999933	SEC14 like lipid binding 1
-	ENSMMUG00000062786	2.01392	0.0292503	1	-
ZNF362	ENSMMUG00000003267	-0.268575	0.0293121	0.999933	zinc finger protein 362
TBX5	ENSMMUG00000016202	0.677676	0.0293325	0.999933	T-box transcription factor 5
-	ENSMMUG00000062885	2.57885	0.0294495	1	-
-	ENSMMUG00000063119	2.14381	0.0295863	0.999933	-
E2F2	ENSMMUG00000011832	0.698702	0.0297495	0.999933	E2F transcription factor 2
SLC4A5	ENSMMUG00000015605	-1.02723	0.0297702	0.999933	solute carrier family 4 member 5
DNAI1	ENSMMUG00000020777	1.14406	0.0298784	0.999933	dynein axonemal intermediate chain 1
KHDRBS3	ENSMMUG00000022248	1.47142	0.0299312	0.999933	KH RNA binding domain containing, signal transduction associated 3
ZNF331	ENSMMUG00000055539	0.780754	0.030253	0.999933	zinc finger protein 331
TSSK2	ENSMMUG00000017385	2.63338	0.0304472	1	testis specific serine kinase 2
CHCHD3	ENSMMUG00000001671	-0.418677	0.0305799	0.999933	coiled-coil-helix-coiled-coil-helix domain containing 3
C1R	ENSMMUG00000006470	-0.981857	0.0306061	0.999933	complement C1r subcomponent
SNRPB	ENSMMUG00000010050	-0.347001	0.0306532	0.999933	small nuclear ribonucleoprotein polypeptides B and B1
MFSD6	ENSMMUG00000007289	-0.540579	0.0308037	0.999933	major facilitator superfamily domain containing 6
-	ENSMMUG00000056598	-1.30025	0.0309654	0.999933	-
DHCR7	ENSMMUG00000011976	-0.607675	0.0310982	0.999933	7-dehydrocholesterol reductase
PID1	ENSMMUG00000060276	-0.924701	0.0311222	0.999933	phosphotyrosine interaction domain containing 1
CMKLR1	ENSMMUG00000042320	-1.08398	0.0311261	0.999933	chemerin chemokine-like receptor 1
PDE9A	ENSMMUG00000022107	0.943987	0.0311351	0.999933	phosphodiesterase 9A
-	ENSMMUG00000060728	3.94198	0.0311986	1	-
ARMC9	ENSMMUG00000011775	0.630352	0.0315039	0.999933	armadillo repeat containing 9
-	ENSMMUG00000049777	-1.72724	0.0315414	1	-
IL1RN	ENSMMUG00000013014	1.42224	0.0316023	0.999933	interleukin 1 receptor antagonist
STXBP1	ENSMMUG00000016421	0.685822	0.0316592	0.999933	syntaxin binding protein 1
PHACTR1	ENSMMUG00000020040	-0.607283	0.0316636	0.999933	phosphatase and actin regulator 1
RPL7A	ENSMMUG00000022341	-0.740138	0.0318731	0.999933	ribosomal protein L7a
SIRT4	ENSMMUG00000046684	0.523294	0.0319255	0.999933	sirtuin 4
AKAP12	ENSMMUG00000023265	0.86294	0.0320047	0.999933	A-kinase anchoring protein 12
ZNF385D	ENSMMUG00000009667	2.60153	0.0321744	1	zinc finger protein 385D
ERN1	ENSMMUG00000015185	0.508748	0.0322385	0.999933	endoplasmic reticulum to nucleus signaling 1
KRT75	ENSMMUG00000018219	-2.28693	0.0322628	1	keratin 75
-	ENSMMUG00000059206	0.972716	0.0323153	0.999933	-
PPP1R13B	ENSMMUG00000018123	0.367201	0.0323704	0.999933	protein phosphatase 1 regulatory subunit 13B
-	ENSMMUG00000051951	3.22635	0.0323949	1	-
-	ENSMMUG00000063761	-0.6813	0.0324398	0.999933	putative methyltransferase C9orf114
-	ENSMMUG00000062026	-0.612294	0.0324504	0.999933	60S ribosomal protein L18a
ZSCAN31	ENSMMUG00000007231	-0.815426	0.0324976	0.999933	zinc finger and SCAN domain containing 31
-	ENSMMUG00000057569	-2.89269	0.0325925	1	-
ARIH2	ENSMMUG00000039597	-0.260371	0.0328344	0.999933	ariadne RBR E3 ubiquitin protein ligase 2
KIAA1522	ENSMMUG00000019743	-0.348251	0.0328502	0.999933	KIAA1522
CLPTM1L	ENSMMUG00000005193	-0.36446	0.0329215	0.999933	CLPTM1 like
FARP1	ENSMMUG00000009890	0.390911	0.0331276	0.999933	FERM, ARH/RhoGEF and pleckstrin domain protein 1
-	ENSMMUG00000063815	3.63572	0.0331414	1	zinc finger protein 208-like
TOR1AIP1	ENSMMUG00000014873	-0.374431	0.0331633	0.999933	torsin 1A interacting protein 1
ADCY3	ENSMMUG00000009600	-0.849739	0.033185	0.999933	adenylate cyclase 3
MERTK	ENSMMUG00000010066	0.62679	0.0332269	0.999933	MER proto-oncogene, tyrosine kinase
FAM214A	ENSMMUG00000001423	-0.33127	0.0332412	0.999933	family with sequence similarity 214 member A
TEF	ENSMMUG00000005221	-0.82256	0.0332991	0.999933	TEF transcription factor, PAR bZIP family member
-	ENSMMUG00000065227	2.55316	0.0333344	1	-
ZNF343	ENSMMUG00000010054	-0.492918	0.0333841	0.999933	zinc finger protein 343
BICRAL	ENSMMUG00000029682	-0.376881	0.0335206	0.999933	BRD4 interacting chromatin remodeling complex associated protein like
SLC29A1	ENSMMUG00000022685	0.422337	0.0335963	0.999933	heat shock protein 90 alpha family class B member 1
-	ENSMMUG00000063078	3.16904	0.0336373	1	-
OPA3	ENSMMUG00000053242	-0.40622	0.0337755	0.999933	outer mitochondrial membrane lipid metabolism regulator OPA3
DGKK	ENSMMUG00000016492	-2.42217	0.0338011	1	diacylglycerol kinase kappa
-	ENSMMUG00000065374	-2.97564	0.033838	1	-
TSPAN6	ENSMMUG00000008209	0.402985	0.0340423	0.999933	tetraspanin 6
GCDH	ENSMMUG00000007043	-0.421352	0.0340954	0.999933	glutaryl-CoA dehydrogenase
PDE6C	ENSMMUG00000014713	-1.40647	0.0341706	1	phosphodiesterase 6C
-	ENSMMUG00000023144	-0.530032	0.0342006	0.999933	farnesyl diphosphate synthase
-	ENSMMUG00000024665	2.43211	0.0342227	1	-
-	ENSMMUG00000054466	3.29039	0.0342421	1	-
LAD1	ENSMMUG00000013507	-0.226009	0.0342704	0.999933	ladinin 1
-	ENSMMUG00000052580	3.06601	0.0343473	1	disintegrin and metalloproteinase domain-containing protein 20-like
MFSD13A	ENSMMUG00000011948	-0.654256	0.0344314	0.999933	major facilitator superfamily domain containing 13A
-	ENSMMUG00000006089	1.58859	0.0344347	0.999933	kinase non-catalytic C-lobe domain containing 1
SNORA8	ENSMMUG00000026121	1.27759	0.0344924	0.999933	small nucleolar RNA, H/ACA box 8
MAGEA4	ENSMMUG00000040274	-0.273496	0.0345167	0.999933	MAGE family member A4
LRRTM1	ENSMMUG00000000291	2.16226	0.0346254	0.999933	leucine rich repeat transmembrane neuronal 1
ISOC2	ENSMMUG00000012704	-0.382404	0.0346384	0.999933	isochorismatase domain containing 2
-	ENSMMUG00000061843	-2.06841	0.0348358	1	-
KRCC1	ENSMMUG00000041136	-0.471475	0.034932	0.999933	lysine rich coiled-coil 1
APBB2	ENSMMUG00000012563	0.590535	0.0349684	0.999933	amyloid beta precursor protein binding family B member 2
-	ENSMMUG00000054330	2.01478	0.0349799	1	-
TRIM8	ENSMMUG00000004394	0.418847	0.035305	0.999933	tripartite motif containing 8
-	ENSMMUG00000059353	-1.58255	0.035333	0.999933	phosphatidylserine synthase 2
PROSER3	ENSMMUG00000002392	0.99462	0.0354573	0.999933	proline and serine rich 3
ZNF622	ENSMMUG00000055492	-0.316623	0.0355015	0.999933	zinc finger protein 622
DOCK9	ENSMMUG00000018657	0.465793	0.0356187	0.999933	dedicator of cytokinesis 9
-	ENSMMUG00000049563	-3.54733	0.0358591	1	-
-	ENSMMUG00000057462	-0.371366	0.0359376	0.999933	histone H2B type 1
PCDH18	ENSMMUG00000008362	0.936782	0.0359921	0.999933	protocadherin 18
SLC29A4	ENSMMUG00000008219	3.24311	0.0360616	1	solute carrier family 29 member 4
DIAPH3	ENSMMUG00000013780	0.583828	0.0361199	0.999933	diaphanous related formin 3
AREG	ENSMMUG00000002314	0.551692	0.0362063	0.999933	amphiregulin
AP5B1	ENSMMUG00000038363	-0.750372	0.036284	0.999933	adaptor related protein complex 5 subunit beta 1
YIPF6	ENSMMUG00000016986	-0.334284	0.0364968	0.999933	Yip1 domain family member 6
ITK	ENSMMUG00000010995	3.00056	0.0365002	1	IL2 inducible T cell kinase
MANEAL	ENSMMUG00000022040	1.68412	0.0368401	1	mannosidase endo-alpha like
HOXC4	ENSMMUG00000055610	1.98476	0.0371087	1	homeobox C4
ITGA2	ENSMMUG00000020448	0.772587	0.0371896	0.999933	integrin subunit alpha 2
DPP4	ENSMMUG00000008387	-0.597556	0.0372352	0.999933	dipeptidyl peptidase 4
SQLE	ENSMMUG00000003535	-0.881933	0.0373132	0.999933	squalene epoxidase
COCH	ENSMMUG00000011514	-1.42145	0.0373155	0.999933	cochlin
NFKBID	ENSMMUG00000019756	1.3409	0.0373943	1	NFKB inhibitor delta
AADACL2	ENSMMUG00000018774	2.73238	0.0373993	1	arylacetamide deacetylase like 2
-	ENSMMUG00000051483	-1.65991	0.0374158	1	-
LIX1L	ENSMMUG00000016053	0.859612	0.0374726	0.999933	limb and CNS expressed 1 like
IRX4	ENSMMUG00000004220	-1.09741	0.0375295	0.999933	iroquois homeobox 4
SLC5A6	ENSMMUG00000010257	-0.324664	0.0375364	0.999933	solute carrier family 5 member 6
PCDHB8	ENSMMUG00000051748	1.54135	0.0375552	0.999933	protocadherin beta 8
-	ENSMMUG00000013289	1.00689	0.0376941	0.999933	leukocyte immunoglobulin like receptor B1
FYN	ENSMMUG00000017017	0.612265	0.0378792	0.999933	FYN proto-oncogene, Src family tyrosine kinase
SSH1	ENSMMUG00000015107	0.584915	0.0379512	0.999933	slingshot protein phosphatase 1
-	ENSMMUG00000054657	-1.08716	0.0379589	0.999933	-
LRRC59	ENSMMUG00000017234	-0.238095	0.0379709	0.999933	leucine rich repeat containing 59
-	ENSMMUG00000054588	-1.71511	0.0380567	1	-
MPDU1	ENSMMUG00000013503	-0.298271	0.0380957	0.999933	mannose-P-dolichol utilization defect 1
MLANA	ENSMMUG00000056663	-2.56924	0.0385827	1	melan-A
KLF6	ENSMMUG00000010696	0.477986	0.0385847	0.999933	Kruppel like factor 6
TRPV6	ENSMMUG00000016219	-0.40046	0.0386912	0.999933	transient receptor potential cation channel subfamily V member 6
MYOM3	ENSMMUG00000023052	1.13756	0.038725	0.999933	myomesin 3
CYP3A5	ENSMMUG00000022730	1.19127	0.0387426	0.999933	cytochrome P450, family 3, subfamily A, polypeptide 5
ADAM2	ENSMMUG00000003137	2.00439	0.0389002	0.999933	ADAM metallopeptidase domain 2
CSH4	ENSMMUG00000023706	-0.768923	0.039009	0.999933	chorionic somatommamotropin hormone 4
ATF5	ENSMMUG00000054473	-0.575259	0.039014	0.999933	activating transcription factor 5
SMARCAL1	ENSMMUG00000019539	-0.411197	0.0390756	0.999933	SWI/SNF related, matrix associated, actin dependent regulator of chromatin, subfamily a like 1
IFT122	ENSMMUG00000012727	0.756652	0.0391473	0.999933	intraflagellar transport 122
SLC24A1	ENSMMUG00000022059	-1.27607	0.0391475	0.999933	solute carrier family 24 member 1
-	ENSMMUG00000044315	-1.26729	0.0393043	0.999933	-
PTPN13	ENSMMUG00000003726	1.56515	0.039314	1	protein tyrosine phosphatase non-receptor type 13
HOOK2	ENSMMUG00000005686	-0.580894	0.0393208	0.999933	hook microtubule tethering protein 2
COL18A1	ENSMMUG00000004472	0.557545	0.0394774	0.999933	collagen type XVIII alpha 1 chain
ZC3H4	ENSMMUG00000014709	-0.359479	0.0395008	0.999933	zinc finger CCCH-type containing 4
RBM11	ENSMMUG00000020089	0.778852	0.0395368	0.999933	RNA binding motif protein 11
UQCC1	ENSMMUG00000010403	-0.344526	0.0395857	0.999933	ubiquinol-cytochrome c reductase complex assembly factor 1
UQCRC1	ENSMMUG00000014705	-0.298247	0.0396862	0.999933	ubiquinol-cytochrome c reductase core protein 1
-	ENSMMUG00000057732	0.412447	0.0397979	0.999933	-
TEAD1	ENSMMUG00000010875	0.415003	0.0397991	0.999933	TEA domain transcription factor 1
ODC1	ENSMMUG00000020441	0.95081	0.0400105	0.999933	ornithine decarboxylase 1
ATP6V1E1	ENSMMUG00000021477	-0.330482	0.0400402	0.999933	ATPase H+ transporting V1 subunit E1
-	ENSMMUG00000064710	2.39732	0.0400521	1	-
TBX10	ENSMMUG00000056105	-1.8576	0.0401228	1	T-box transcription factor 10
LAPTM4A	ENSMMUG00000001582	-0.303838	0.0401309	0.999933	lysosomal protein transmembrane 4 alpha
GNE	ENSMMUG00000006135	-0.361056	0.0402957	0.999933	glucosamine (UDP-N-acetyl)-2-epimerase/N-acetylmannosamine kinase
CAD	ENSMMUG00000010269	-0.377456	0.0403259	0.999933	carbamoyl-phosphate synthetase 2, aspartate transcarbamylase, and dihydroorotase
KCNN3	ENSMMUG00000017793	-2.5568	0.0406147	1	potassium calcium-activated channel subfamily N member 3
SLA2	ENSMMUG00000008200	-2.42637	0.040738	1	Src like adaptor 2
DUSP18	ENSMMUG00000019805	0.464116	0.0407532	0.999933	dual specificity phosphatase 18
SLC35B3	ENSMMUG00000010672	-0.315719	0.0407612	0.999933	solute carrier family 35 member B3
FGF1	ENSMMUG00000057828	-0.445059	0.040817	0.999933	fibroblast growth factor 1
PDZD3	ENSMMUG00000012190	-4.25744	0.0408284	1	PDZ domain containing 3
SH2D7	ENSMMUG00000042955	-0.754861	0.0409567	0.999933	SH2 domain containing 7
DNAH9	ENSMMUG00000018539	1.03169	0.040999	0.999933	dynein axonemal heavy chain 9
MAPK11	ENSMMUG00000014107	0.781254	0.0410242	0.999933	mitogen-activated protein kinase 11
CYP26A1	ENSMMUG00000010881	2.6644	0.0410365	0.999933	cytochrome P450, family 26, subfamily A, polypeptide 1
SRD5A1	ENSMMUG00000013186	-1.3337	0.0410879	0.999933	steroid 5 alpha-reductase 1
SAMD4A	ENSMMUG00000010315	0.515302	0.0412892	0.999933	sterile alpha motif domain containing 4A
CX3CR1	ENSMMUG00000065286	1.71758	0.0414599	0.999933	C-X3-C motif chemokine receptor 1
-	ENSMMUG00000062973	-1.15145	0.0415184	0.999933	-
NUAK2	ENSMMUG00000049565	0.780369	0.0415527	0.999933	NUAK family kinase 2
mml-mir-520g	ENSMMUG00000032693	1.18483	0.0416769	0.999933	mml-mir-520g
MMP12	ENSMMUG00000004250	-3.43233	0.0419799	1	matrix metallopeptidase 12
RGS5	ENSMMUG00000005186	0.635734	0.0419916	0.999933	regulator of G protein signaling 5
ABI3	ENSMMUG00000002437	0.666408	0.0420498	0.999933	ABI family member 3
-	ENSMMUG00000059477	2.34574	0.0420869	1	-
PDSS2	ENSMMUG00000002271	-0.463831	0.0421671	0.999933	decaprenyl diphosphate synthase subunit 2
-	ENSMMUG00000053551	-2.33314	0.0421779	1	-
SAMD11	ENSMMUG00000005947	2.75077	0.0422185	1	sterile alpha motif domain containing 11
APOB	ENSMMUG00000007692	1.59133	0.0422278	1	apolipoprotein B
CFP	ENSMMUG00000032465	0.73065	0.0422716	0.999933	complement factor properdin
-	ENSMMUG00000014173	-1.33187	0.0423193	1	-
-	ENSMMUG00000059782	3.31782	0.0423474	1	-
ITGA4	ENSMMUG00000000300	0.941008	0.0424167	0.999933	integrin subunit alpha 4
CCL8	ENSMMUG00000009784	1.76112	0.0424195	1	C-C motif chemokine ligand 8
ZNF254	ENSMMUG00000052284	1.12963	0.042467	0.999933	zinc finger protein 254
TGFB1I1	ENSMMUG00000000896	0.626096	0.0424829	0.999933	transforming growth factor beta 1 induced transcript 1
MPPED2	ENSMMUG00000017592	-0.773397	0.0427807	0.999933	metallophosphoesterase domain containing 2
AKAP3	ENSMMUG00000020812	-1.0747	0.0429033	0.999933	A-kinase anchoring protein 3
MSMO1	ENSMMUG00000056040	-0.744384	0.0429388	0.999933	methylsterol monooxygenase 1
TSPAN5	ENSMMUG00000011702	-0.37651	0.0429838	0.999933	tetraspanin 5
SH3BP5	ENSMMUG00000006661	0.743216	0.0430276	0.999933	SH3 domain binding protein 5
-	ENSMMUG00000015217	-0.658219	0.0431111	0.999933	EEF1A lysine methyltransferase 2
ABCC4	ENSMMUG00000021807	0.803593	0.0431736	0.999933	ATP binding cassette subfamily C member 4
ARPC2	ENSMMUG00000022808	0.568684	0.0432265	0.999933	actin related protein 2/3 complex subunit 2
SLC45A4	ENSMMUG00000013579	0.807224	0.0432322	0.999933	solute carrier family 45 member 4
LNX1	ENSMMUG00000017401	-0.537455	0.0432334	0.999933	ligand of numb-protein X 1
KLHL42	ENSMMUG00000021742	0.392635	0.0433475	0.999933	kelch like family member 42
HAL	ENSMMUG00000009308	2.01743	0.043415	1	histidine ammonia-lyase
-	ENSMMUG00000042118	1.7216	0.0434434	1	-
PLCB2	ENSMMUG00000020535	0.559606	0.0434564	0.999933	phospholipase C beta 2
-	ENSMMUG00000050330	2.21233	0.0434811	1	-
mml-mir-517a	ENSMMUG00000062390	2.41596	0.0434812	1	mml-mir-517a
-	ENSMMUG00000009038	-0.596537	0.0435162	0.999933	titin
-	ENSMMUG00000013491	0.556019	0.0436787	0.999933	retinitis pigmentosa GTPase regulator
MMP1	ENSMMUG00000002037	-1.227	0.0436992	0.999933	matrix metallopeptidase 1
EDNRB	ENSMMUG00000005131	-0.349496	0.0438484	0.999933	endothelin receptor type B
CYP1B1	ENSMMUG00000013945	2.91181	0.0438748	0.999933	cytochrome P450, family 1, subfamily B, polypeptide 1
MAP3K5	ENSMMUG00000016376	0.690699	0.043887	0.999933	mitogen-activated protein kinase kinase kinase 5
ANTXR2	ENSMMUG00000003333	-0.550891	0.0438926	0.999933	ANTXR cell adhesion molecule 2
LAMC1	ENSMMUG00000015084	0.255239	0.0439043	0.999933	laminin subunit gamma 1
ZNF395	ENSMMUG00000060762	0.947834	0.0442472	0.999933	zinc finger protein 395
NRG3	ENSMMUG00000017380	1.93836	0.044281	0.999933	neuregulin 3
ETNPPL	ENSMMUG00000011903	-3.4755	0.0443069	1	ethanolamine-phosphate phospho-lyase
POSTN	ENSMMUG00000012307	1.00886	0.044364	0.999933	periostin
CACNA1H	ENSMMUG00000014213	0.914821	0.044425	0.999933	calcium voltage-gated channel subunit alpha1 H
-	ENSMMUG00000007369	-3.06955	0.0444316	1	-
-	ENSMMUG00000056019	-2.33311	0.0444824	1	-
U6	ENSMMUG00000025365	3.36173	0.0447619	1	U6 spliceosomal RNA
ARHGEF2	ENSMMUG00000005092	0.511465	0.0447852	0.999933	Rho/Rac guanine nucleotide exchange factor 2
BTBD19	ENSMMUG00000040001	0.529655	0.044827	0.999933	BTB domain containing 19
PINX1	ENSMMUG00000010180	0.674796	0.0449134	0.999933	PIN2 (TERF1) interacting telomerase inhibitor 1
PIK3R3	ENSMMUG00000015080	0.936192	0.0449149	0.999933	phosphoinositide-3-kinase regulatory subunit 3
CD93	ENSMMUG00000016813	0.59046	0.0451317	0.999933	CD93 molecule
FMR1	ENSMMUG00000015814	-0.383424	0.0452749	0.999933	FMRP translational regulator 1
GTPBP4	ENSMMUG00000010813	-0.335093	0.0452895	0.999933	GTP binding protein 4
RTL1	ENSMMUG00000005473	0.755111	0.0453544	0.999933	retrotransposon Gag like 1
-	ENSMMUG00000050172	0.734708	0.0456601	0.999933	-
SWSAP1	ENSMMUG00000010824	-0.553189	0.0456918	0.999933	SWIM-type zinc finger 7 associated protein 1
ZNF418	ENSMMUG00000043611	0.763031	0.0457035	0.999933	zinc finger protein 418
SGPL1	ENSMMUG00000009800	0.271623	0.0457592	0.999933	sphingosine-1-phosphate lyase 1
FAM83H	ENSMMUG00000014257	-0.434472	0.0458883	0.999933	family with sequence similarity 83 member H
CRMP1	ENSMMUG00000019563	1.44997	0.0459826	0.999933	collapsin response mediator protein 1
SPARC	ENSMMUG00000053367	0.346887	0.0460243	0.999933	secreted protein acidic and cysteine rich
RASSF8	ENSMMUG00000018385	0.473362	0.0460872	0.999933	Ras association domain family member 8
SCG5	ENSMMUG00000012283	0.823221	0.0460891	0.999933	secretogranin V
UTRN	ENSMMUG00000019438	0.421138	0.0461526	0.999933	utrophin
CPSF4L	ENSMMUG00000001271	2.58335	0.0461529	1	cleavage and polyadenylation specific factor 4 like
-	ENSMMUG00000063084	-0.795141	0.0462133	0.999933	-
LACTB2	ENSMMUG00000012513	-0.69376	0.0462956	0.999933	lactamase beta 2
GZMA	ENSMMUG00000001597	-1.38636	0.0463149	0.999933	granzyme A
-	ENSMMUG00000051016	1.53889	0.0463779	1	-
HTR1B	ENSMMUG00000015717	3.29191	0.0464849	1	5-hydroxytryptamine receptor 1B
RAB15	ENSMMUG00000004339	0.418939	0.0464914	0.999933	RAB15, member RAS oncogene family
NOTCH4	ENSMMUG00000018461	0.667041	0.046604	0.999933	notch receptor 4
PDE5A	ENSMMUG00000007305	-0.534118	0.0466881	0.999933	phosphodiesterase 5A
DGAT2	ENSMMUG00000000185	1.31981	0.0468149	0.999933	diacylglycerol O-acyltransferase 2
ANGPTL4	ENSMMUG00000000698	1.50351	0.0468475	0.999933	angiopoietin like 4
CDCP1	ENSMMUG00000005742	0.902131	0.047032	0.999933	CUB domain containing protein 1
-	ENSMMUG00000058475	2.05701	0.0470373	1	-
HS6ST2	ENSMMUG00000004198	0.921182	0.0471784	0.999933	heparan sulfate 6-O-sulfotransferase 2
NLRP7	ENSMMUG00000005266	-1.69518	0.0473028	0.999933	NLR family pyrin domain containing 7
-	ENSMMUG00000045425	0.573524	0.0474091	0.999933	-
ZNF518A	ENSMMUG00000001518	-0.440024	0.0475276	0.999933	zinc finger protein 518A
PHAX	ENSMMUG00000016683	-0.30576	0.0475276	0.999933	phosphorylated adaptor for RNA export
-	ENSMMUG00000054711	-1.32339	0.047599	0.999933	-
FUCA2	ENSMMUG00000005366	-0.40286	0.0476972	0.999933	alpha-L-fucosidase 2
Metazoa_SRP	ENSMMUG00000055903	-2.15655	0.0478688	1	Metazoan signal recognition particle RNA
DTL	ENSMMUG00000010176	0.596234	0.0478749	0.999933	denticleless E3 ubiquitin protein ligase homolog
COQ8A	ENSMMUG00000008636	-0.606246	0.0479227	0.999933	coenzyme Q8A
-	ENSMMUG00000054011	3.66836	0.0479647	1	-
ZNF93	ENSMMUG00000054055	0.468908	0.0482535	0.999933	zinc finger protein 93
INO80D	ENSMMUG00000001053	0.487321	0.048263	0.999933	INO80 complex subunit D
ASTN2	ENSMMUG00000013105	1.48917	0.0482955	0.999933	astrotactin 2
MRPS31	ENSMMUG00000001899	0.591568	0.0483031	0.999933	mitochondrial ribosomal protein S31
DPYD	ENSMMUG00000020726	-0.79238	0.0483499	0.999933	dihydropyrimidine dehydrogenase
CCL5	ENSMMUG00000054796	-1.26679	0.0484508	0.999933	C-C motif chemokine ligand 5
UAP1L1	ENSMMUG00000047506	0.877332	0.04849	0.999933	UDP-N-acetylglucosamine pyrophosphorylase 1 like 1
DRD5	ENSMMUG00000002783	-4.58842	0.0485539	1	dopamine receptor D5
-	ENSMMUG00000057715	-1.18697	0.0485761	0.999933	-
DHPS	ENSMMUG00000016869	-0.292688	0.0485971	0.999933	deoxyhypusine synthase
ZNF567	ENSMMUG00000022794	0.680721	0.0486528	0.999933	zinc finger protein 567
PDZD2	ENSMMUG00000013954	-0.433091	0.0486757	0.999933	PDZ domain containing 2
ABLIM1	ENSMMUG00000022524	0.552685	0.0488384	0.999933	actin binding LIM protein 1
-	ENSMMUG00000053966	3.66241	0.0490434	1	-
CENPK	ENSMMUG00000016509	0.869711	0.0490647	0.999933	centromere protein K
FES	ENSMMUG00000004659	0.543923	0.049165	0.999933	FES proto-oncogene, tyrosine kinase
NR4A3	ENSMMUG00000011410	0.959962	0.0492046	0.999933	nuclear receptor subfamily 4 group A member 3
-	ENSMMUG00000057835	1.59542	0.0492115	1	thymosin beta 15B
-	ENSMMUG00000039212	0.960655	0.049224	0.999933	heat shock protein family A (Hsp70) member 6
XBP1	ENSMMUG00000007215	-0.220081	0.049253	0.999933	X-box binding protein 1
SASH1	ENSMMUG00000004893	0.674271	0.0493237	0.999933	SAM and SH3 domain containing 1
-	ENSMMUG00000063549	0.540547	0.04934	0.999933	-
CCR1	ENSMMUG00000056769	1.8163	0.0494487	0.999933	C-C motif chemokine receptor 1
SREBF2	ENSMMUG00000003357	-0.482703	0.0494871	0.999933	sterol regulatory element binding transcription factor 2
TCF4	ENSMMUG00000012001	0.7509	0.0495217	0.999933	transcription factor 4
-	ENSMMUG00000059168	1.51091	0.0495978	1	-
ZEB1	ENSMMUG00000015453	0.721559	0.0496137	0.999933	zinc finger E-box binding homeobox 1
RBIS	ENSMMUG00000006381	0.526295	0.0496385	0.999933	ribosomal biogenesis factor
-	ENSMMUG00000050110	-1.75028	0.0497314	1	-
SPAG7	ENSMMUG00000054585	-0.445887	0.0497753	0.999933	sperm associated antigen 7
FGL2	ENSMMUG00000055568	0.566963	0.0498444	0.999933	fibrinogen like 2
Metazoa_SRP	ENSMMUG00000052889	3.24286	0.0499543	1	Metazoan signal recognition particle RNA
C19H19orf54	ENSMMUG00000017708	-0.42275	0.0499562	0.999933	chromosome 19 C19orf54 homolog
PHF11	ENSMMUG00000013476	0.556598	0.0499888	0.999933	PHD finger protein 11
IL19	ENSMMUG00000023570	1.05428	NA	1	interleukin 19
-	ENSMMUG00000060677	2.36472	NA	1	-
HORMAD1	ENSMMUG00000010669	0.529548	NA	1	HORMA domain containing 1
U1	ENSMMUG00000063769	-2.67565	NA	1	U1 spliceosomal RNA
-	ENSMMUG00000028695	-22.2516	NA	1	-
-	ENSMMUG00000065039	-6.46821	NA	1	-
UBXN10	ENSMMUG00000038517	4.79635	NA	1	UBX domain protein 10
OTUD3	ENSMMUG00000010764	0.865029	NA	1	OTU deubiquitinase 3
CLCNKB	ENSMMUG00000018235	-3.09796	NA	1	chloride voltage-gated channel Kb
ERRFI1	ENSMMUG00000042176	2.4201	NA	1	ERBB receptor feedback inhibitor 1
ATP13A5	ENSMMUG00000009760	2.58009	NA	1	ATPase 13A5
COL6A5	ENSMMUG00000020377	-4.12721	NA	1	collagen type VI alpha 5 chain
-	ENSMMUG00000028689	-11.4611	NA	1	-
ARHGEF3	ENSMMUG00000010163	1.13536	NA	1	Rho guanine nucleotide exchange factor 3
SYNPR	ENSMMUG00000023718	3.38096	NA	1	synaptoporin
-	ENSMMUG00000057758	-0.935529	NA	1	-
SEL1L3	ENSMMUG00000020349	1.42781	NA	1	SEL1L family member 3
CXCL8	ENSMMUG00000060156	-2.4258	NA	1	C-X-C motif chemokine ligand 8
UCP1	ENSMMUG00000015244	-3.7683	NA	1	uncoupling protein 1
SAP30	ENSMMUG00000002401	2.31507	NA	1	Sin3A associated protein 30
ANKRD37	ENSMMUG00000062744	4.90313	NA	1	ankyrin repeat domain 37
NRIP1	ENSMMUG00000058750	1.92129	NA	1	nuclear receptor interacting protein 1
POP7	ENSMMUG00000008581	1.08829	NA	1	POP7 homolog, ribonuclease P/MRP subunit
EPO	ENSMMUG00000022863	3.8765	NA	1	erythropoietin
-	ENSMMUG00000062451	0.328977	NA	1	-
LEP	ENSMMUG00000005322	1.6628	NA	1	leptin
FAM131B	ENSMMUG00000012633	-0.308549	NA	1	family with sequence similarity 131 member B
CDH10	ENSMMUG00000012293	3.06931	NA	1	cadherin 10
-	ENSMMUG00000030178	-0.504918	NA	1	prothymosin alpha-like
-	ENSMMUG00000061973	-4.94099	NA	1	-
SPINK1	ENSMMUG00000017227	-5.04487	NA	1	serine peptidase inhibitor Kazal type 1
SOD2	ENSMMUG00000050418	-0.744431	NA	1	superoxide dismutase 2
KATNA1	ENSMMUG00000004646	0.80893	NA	1	katanin catalytic subunit A1
CRISP3	ENSMMUG00000019818	3.76856	NA	1	cysteine rich secretory protein 3
MEP1A	ENSMMUG00000023000	0.477477	NA	1	meprin A subunit alpha
-	ENSMMUG00000029987	-0.205491	NA	1	-
-	ENSMMUG00000041076	2.87857	NA	1	-
-	ENSMMUG00000054038	1.78765	NA	1	class I histocompatibility antigen, Gogo-B*0103 alpha chain-like
EDN1	ENSMMUG00000051532	0.298759	NA	1	endothelin 1
-	ENSMMUG00000063524	-1.18621	NA	1	-
U7	ENSMMUG00000064387	-1.37929	NA	1	U7 small nuclear RNA
EGLN3	ENSMMUG00000000040	2.5782	NA	1	egl-9 family hypoxia inducible factor 3
FOXA1	ENSMMUG00000056013	-4.97853	NA	1	forkhead box A1
-	ENSMMUG00000055473	2.03588	NA	1	-
IGHM	ENSMMUG00000045298	1.36426	NA	1	immunoglobulin heavy constant mu
-	ENSMMUG00000055031	-0.559957	NA	1	-
-	ENSMMUG00000052325	0.172132	NA	1	-
-	ENSMMUG00000062267	1.89059	NA	1	X antigen family member 1
ZNF185	ENSMMUG00000015264	-1.27815	NA	1	zinc finger protein 185 with LIM domain
PI15	ENSMMUG00000049279	5.14754	NA	1	peptidase inhibitor 15
HEY1	ENSMMUG00000002740	2.13145	NA	1	hes related family bHLH transcription factor with YRPW motif 1
GRINA	ENSMMUG00000056458	1.29463	NA	1	protein lifeguard 1
-	ENSMMUG00000056090	-4.95792	NA	1	-
-	ENSMMUG00000028672	-25.1414	NA	1	-
-	ENSMMUG00000049833	-14.1247	NA	1	-
-	ENSMMUG00000064778	-1.52381	NA	1	-
CYP2C8	ENSMMUG00000045340	-4.60888	NA	1	cytochrome P450, family 2, subfamily C, polypeptide 8
-	ENSMMUG00000063121	1.14092	NA	1	-
KLRD1	ENSMMUG00000018298	-1.51936	NA	1	killer cell lectin like receptor D1
CD69	ENSMMUG00000015297	3.88435	NA	1	CD69 molecule
KRT5	ENSMMUG00000055016	-0.425373	NA	1	keratin, type II cytoskeletal 6A
-	ENSMMUG00000042063	-0.418918	NA	1	pyruvate kinase PKM
C12H2orf88	ENSMMUG00000037672	-2.08223	NA	1	chromosome 12 C2orf88 homolog
-	ENSMMUG00000056319	1.46296	NA	1	-
USH1C	ENSMMUG00000023582	-2.36029	NA	1	USH1 protein network component harmonin
FEZ1	ENSMMUG00000008048	-2.20654	NA	1	fasciculation and elongation protein zeta 1
EI24	ENSMMUG00000010009	-0.790147	NA	1	EI24 autophagy associated transmembrane protein
-	ENSMMUG00000063434	-4.79068	NA	1	-
C9orf129	ENSMMUG00000031598	0.888944	NA	1	chromosome 15 C9orf129 homolog
FAM110C	ENSMMUG00000061991	3.42094	NA	1	family with sequence similarity 110 member C
PRAME	ENSMMUG00000010657	2.14526	NA	1	melanoma antigen preferentially expressed in tumors
CST7	ENSMMUG00000005757	-0.0857852	NA	1	cystatin F
-	ENSMMUG00000063629	-1.24362	NA	1	cystatin SA
SRMS	ENSMMUG00000050161	3.84845	NA	1	src-related kinase lacking C-terminal regulatory tyrosine and N-terminal myristylation sites
FNDC11	ENSMMUG00000006069	5.99698	NA	1	fibronectin type III domain containing 11
KLHL1	ENSMMUG00000019967	-0.0528659	NA	1	kelch like family member 1
-	ENSMMUG00000060821	0.430266	NA	1	small EDRK-rich factor 2-like
-	ENSMMUG00000041892	-0.760701	NA	1	-
-	ENSMMUG00000055366	-22.0725	NA	1	-
-	ENSMMUG00000062894	-27.2391	NA	1	-
CCL7	ENSMMUG00000009782	-5.47673	NA	1	C-C motif chemokine ligand 7
WNT9B	ENSMMUG00000020810	2.99386	NA	1	Wnt family member 9B
-	ENSMMUG00000009283	0.776346	NA	1	intercellular adhesion molecule 5
CSH3	ENSMMUG00000057492	0.727298	NA	1	chorionic somatommamotropin hormone 3
SOCS3	ENSMMUG00000058428	-1.23347	NA	1	suppressor of cytokine signaling 3
CNTNAP4	ENSMMUG00000003916	5.33241	NA	1	contactin associated protein family member 4
TUBB3	ENSMMUG00000029059	8.67179	NA	1	tubulin beta 3 class III
-	ENSMMUG00000055928	-0.821181	NA	1	-
-	ENSMMUG00000056220	1.86857	NA	1	follistatin like 3
RFX2	ENSMMUG00000011967	0.91271	NA	1	regulatory factor X2
ICAM1	ENSMMUG00000014896	1.7777	NA	1	intercellular adhesion molecule 1
CEACAM7	ENSMMUG00000059229	4.94782	NA	1	CEA cell adhesion molecule 7
ATP1A3	ENSMMUG00000017427	-0.0217552	NA	1	ATPase Na+/K+ transporting subunit alpha 3
-	ENSMMUG00000050201	-1.32718	NA	1	tyrosine-protein kinase JAK3-like
-	ENSMMUG00000055841	-1.00337	NA	1	beta-defensin 4A-like
PLAC9	ENSMMUG00000065348	-2.57979	NA	1	placenta associated 9
